# Supplementary material for: Natural Genetic Diversity in Tomato Flavor Genes
Source: Front Plant Sci. 2021 Jun 4;12:642828. doi: 10.3389/fpls.2021.642828 (PMC8212054; doi:10.3389/fpls.2021.642828)
Supplement: Supplementary Table 7 — Quality parameters of the protein modeling predictions. [file Table_7.xlsx]

## Sheet: Sheet1
Protein	Template	PDBTitle	Species	Confidence (%)	Identity (%)	Coverage (%)	Pfam Domains	Transmembrane domains
LIN5	c2ac1A_	Cell-wall invertase	Arabidopsis thaliana	100	52	91	Glycosyl hydrolases family 32	1
ALMT9	c6ajjA_	mycolic acid transporter	Mycobacterium smegmatis	56.1	16	29		7
CXE1	c6rt8H_	alpha-beta hydrolase	Catharanthus roseus	100	39	98		0
AAT1	c4g0bA_	hydroxycinnamoyl-coa transferase	Coffea canephora	100	29	95	Transferase family	1
LoxC	d1rrha1	lipoxygenases	Plant - not specified	100	48	94	PLAT and Lipoxygenase	0
